# Supplementary material for: Management of Pelvic Fracture Urethral Injury: Is Supracrural Urethral Rerouting (Step 4) Becoming Anecdotical or Does It Remain in Force?
Source: MDPI journal article supplement (doi:10.3390/jcm12062427), 2023-03-22
Supplement: s1 [file s1]

**Table S1.** Complications of PPT according to Clavien-Dindo classification.

| Complications | Grade II | Cases, n     | Grade III             | Cases, n      |
|---------------|----------|--------------|-----------------------|---------------|
| Early         | UTI      | 9/68 (13.2%) |                       |               |
| Late          |          |              | Diverticulum from PPT | 21/68 (30.8%) |
|               |          |              | Stone formation       | 2/68 (2.9%)   |
